# Supplementary material for: Robust characterization of two distinct glutarate sensing transcription factors of Pseudomonas putida L-lysine metabolism
Source: bioRxiv or medRxiv preprint supplement (doi:10.1101/557751), 2019-08-28

Robust characterization of two distinct glutarate sensing transcription factors of *Pseudomonas putida* L-lysine metabolism

Mitchell G. Thompson<sup>1,2,3</sup>, Zak Costello<sup>1,2,4</sup>, Niklas F. C. Hummel<sup>1,7</sup>, Pablo Cruz-Morales<sup>1,2,5</sup>, Jacquelyn M. Blake-Hedges<sup>1,2,6</sup>, Rohith N. Krishna<sup>1,2,6</sup>, Will Skyrud<sup>6</sup>, Allison N. Pearson<sup>1,2</sup>, Matthew R. Incha<sup>1,2,3</sup>, Patrick M. Shih<sup>1,7</sup>, Hector Garcia-Martin<sup>1,2,4,8</sup>, Jay D. Keasling<sup>1,2,9,10,11,12,\*</sup>

<sup>1</sup>Joint BioEnergy Institute, 5885 Hollis Street, Emeryville, CA 94608, USA.

<sup>2</sup>Biological Systems & Engineering Division, Lawrence Berkeley National Laboratory, Berkeley, CA 94720, USA.

<sup>3</sup>Department of Plant and Microbial Biology, University of California, Berkeley, CA 94720, USA

<sup>4</sup>DOE Agile BioFoundry, Emeryville, CA, USA

<sup>5</sup>Centro de Biotecnologia FEMSA, Instituto Tecnológico y de Estudios superiores de Monterrey, Mexico

<sup>6</sup>Department of Chemistry, University of California, Berkeley, CA 94720, USA

<sup>7</sup>Department of Plant Biology, University of California, Davis, Davis, CA, United States

<sup>8</sup>BCAM, Basque Center for Applied Mathematics, Bilbao, Spain

<sup>9</sup>Joint Program in Bioengineering, University of California, Berkeley/San Francisco, CA 94720, USA

<sup>10</sup>Department of Chemical and Biomolecular Engineering, University of California, Berkeley, CA 94720, USA

<sup>11</sup>The Novo Nordisk Foundation Center for Biosustainability, Technical University of Denmark, Denmark

<sup>12</sup>Center for Synthetic Biochemistry, Institute for Synthetic Biology, Shenzhen Institutes for Advanced Technologies, Shenzhen, China

\*To whom correspondence may be addressed. Email: JDKeasling@lbl.gov

## **Supporting Information**

### **Supplementary Figures**

Figure S1. SDS-PAGE gels showing the purification of GcdR (A), and CsiR (B) via affinity purification.

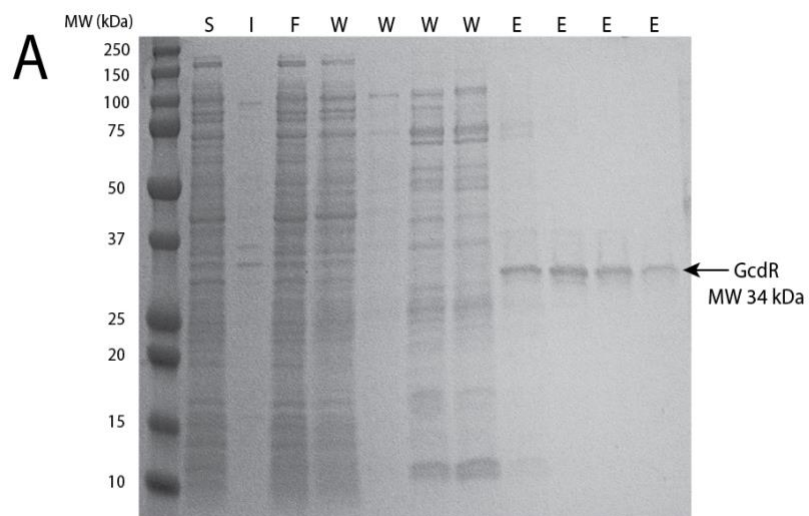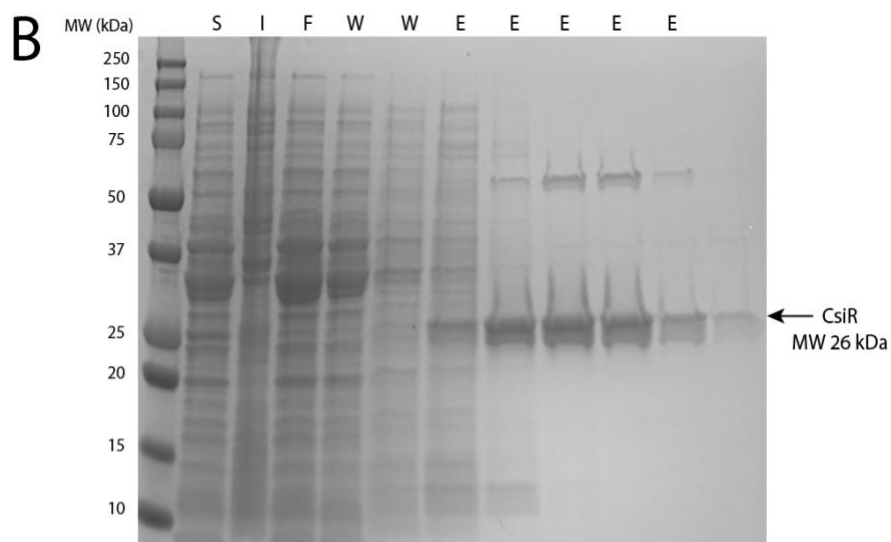

S = Soluble  
I = Insoluble  
F = Flowthrough  
W = Wash  
E = Elution

**Figure S2. Induction of the CsiR (A), or GcdR (B) biosensor vectors by succinate, adipate, and pimelate. Error bars represent 95% CI, n=4.**

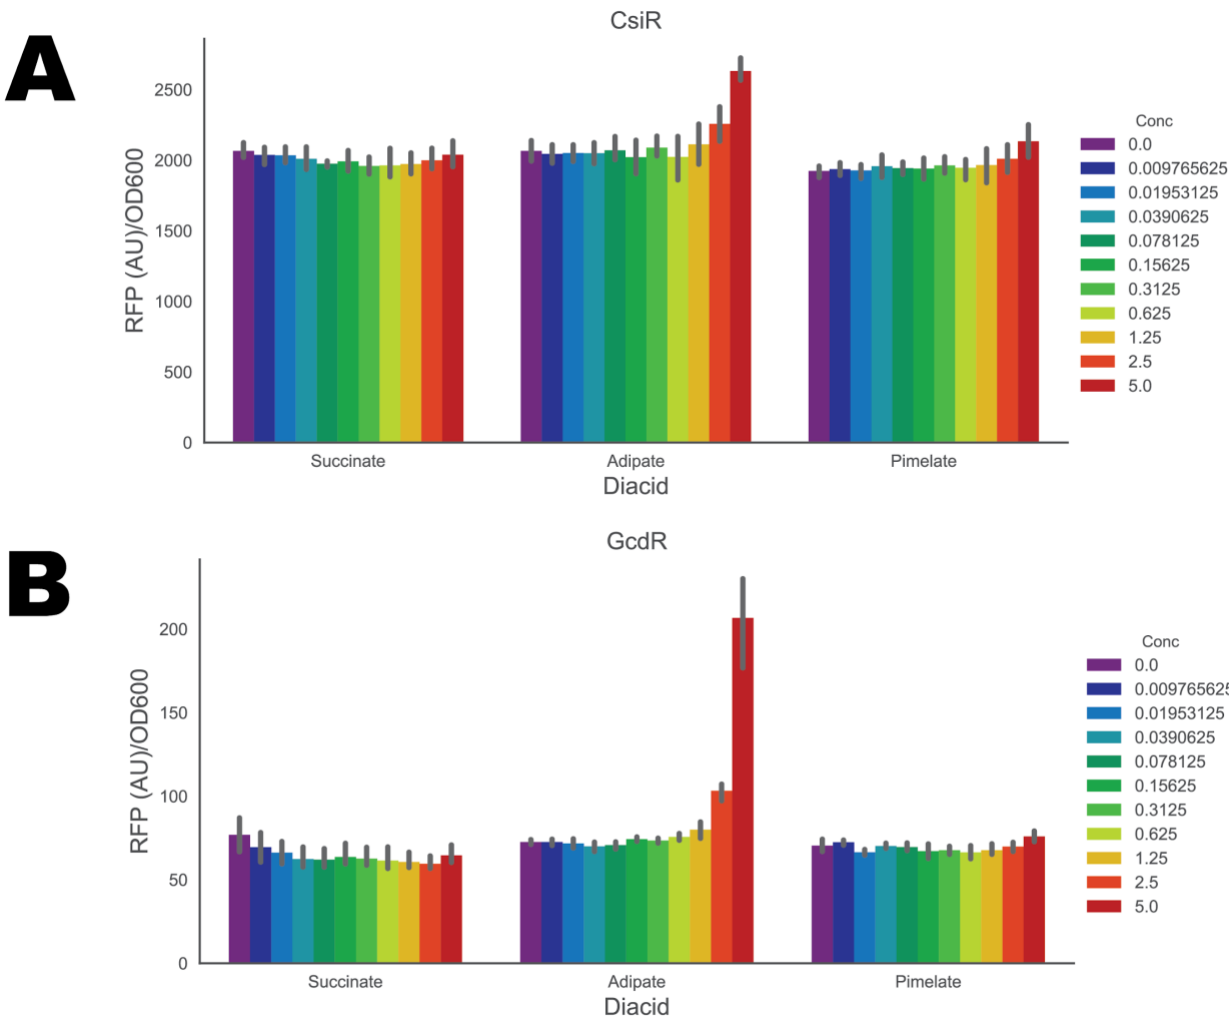

**Figures S3. Application of MCMC methodology to characterized BglBrick vectors. (A) Raw RFP expression data from SC101 and ColE1 arabinose inducible BglBrick vectors with increasing concentrations of arabinose (%w/v). (B) OD600 normalized and basal-expression zeroed fluorescence data fit to the Hill equation. Points show individual experimental measurements. n=4 (C) MCMC predicted resolution of SC101 or ColE1 biosensor systems over a select range of arabinose concentrations %w/v.**

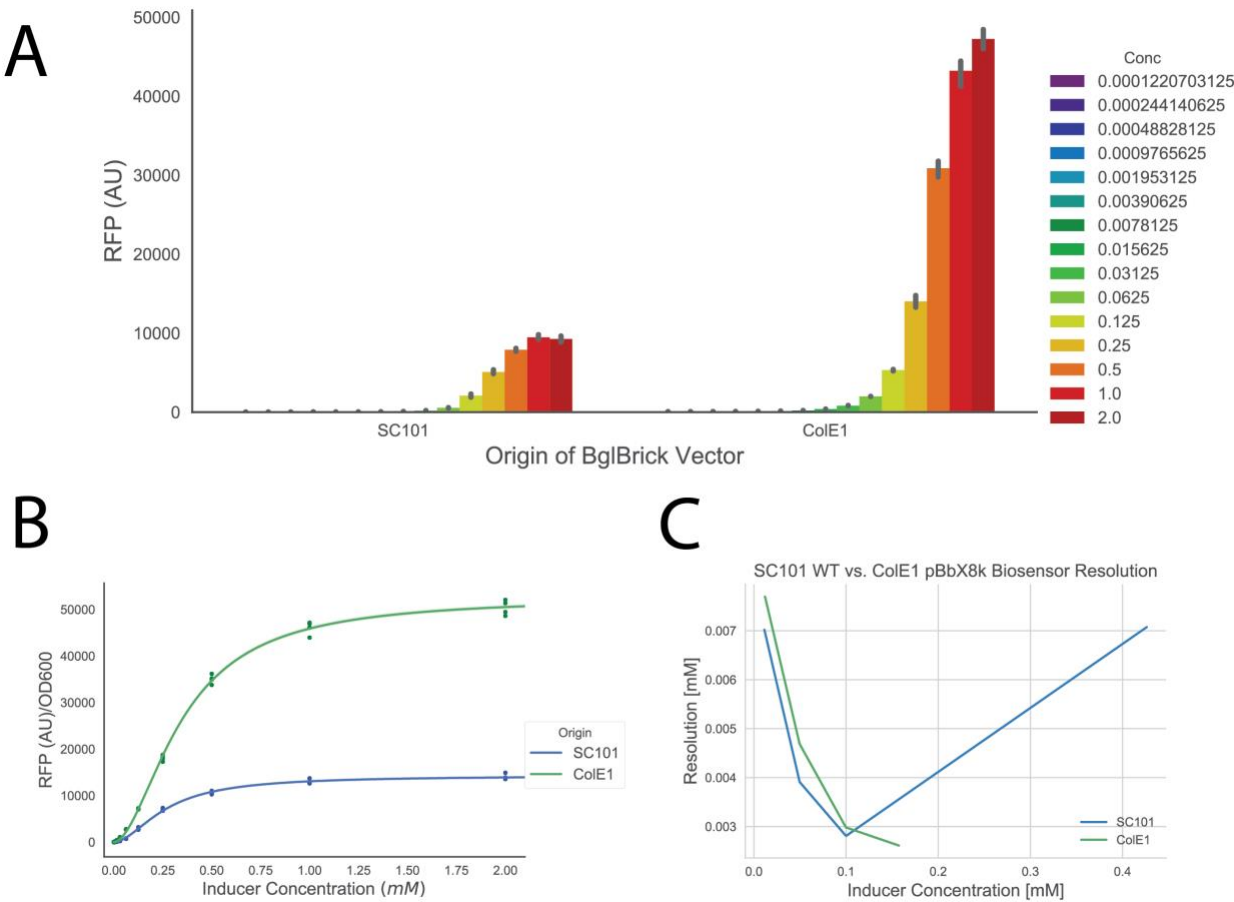

**Figures S4. Growth and fluorescence of *csiR* and *gcdR* vectors in *P. putida* KT2440 (A)**

**Growth of strains harboring *gcdR* vector (left), RFP fluorescence (right) on MOPS minimal media supplemented with 10mM of glucose, L-lysine, D-lysine, 5-aminovalerate, or 2-aminoadipate as a sole carbon source. Shaded region represents 95% CI, n=3. (B) Growth of strains harboring *csiR* vector (left), RFP fluorescence (right) on MOPS minimal medium supplemented with 10mM of glucose, L-lysine, D-lysine, 5-aminovalerate, or 2-aminoadipate as a sole carbon source. Shaded region represents 95% CI, n=3.**

**A**

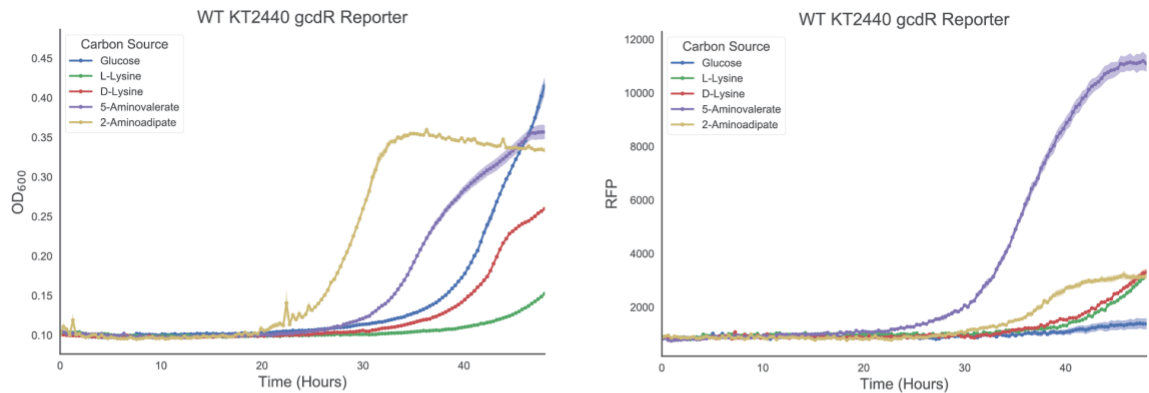

**B**

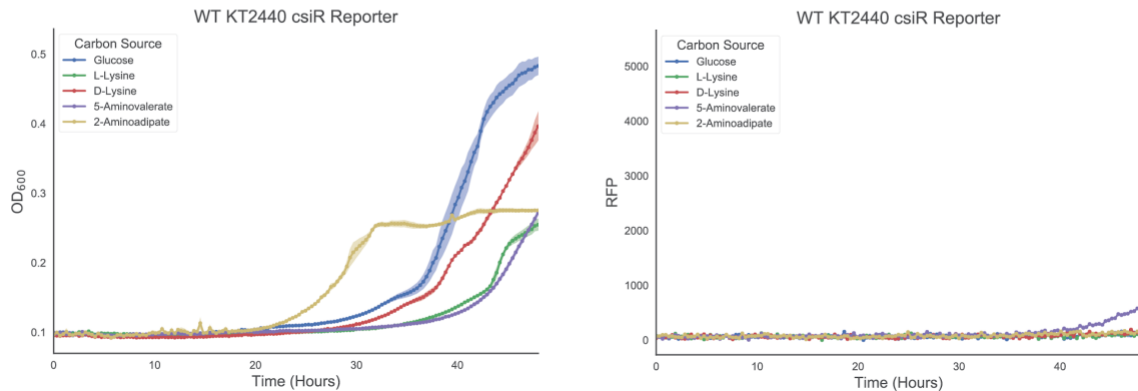

Supplement: Supplementary file [file media-1.pdf]
